# Supplementary material
Source: PubMed Central journal article supplement (PMC4677544)
Supplement: Supp_Fig1.pdf [file Supp_Fig1.pdf]

## Supplementary Data

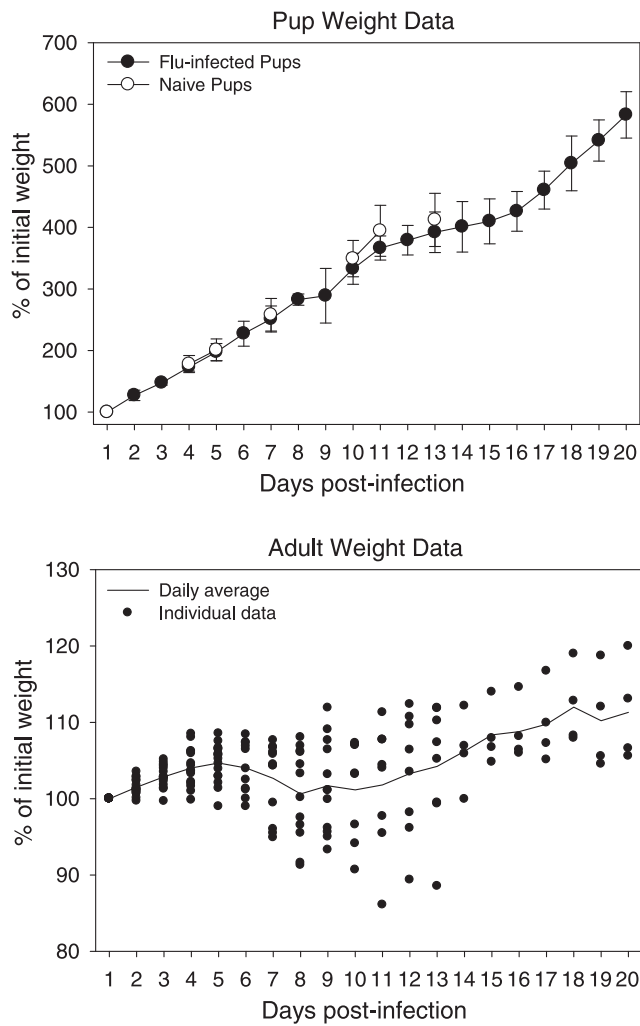

**SUPPLEMENTARY FIG. S1.** Mice were infected with an LD<sub>10</sub> dose of influenza virus A (PR8) and body weights determined daily. Pup weights are mean  $\pm$  SD. For adults, individual mouse weights are shown. Note that the number of mice decreased over time as mice were used for specific time points. SD, standard deviation.
