# Supplementary material
Source: PubMed Central journal article supplement (PMC4677544)
Supplement: Supp_Fig2.pdf [file Supp_Fig2.pdf]

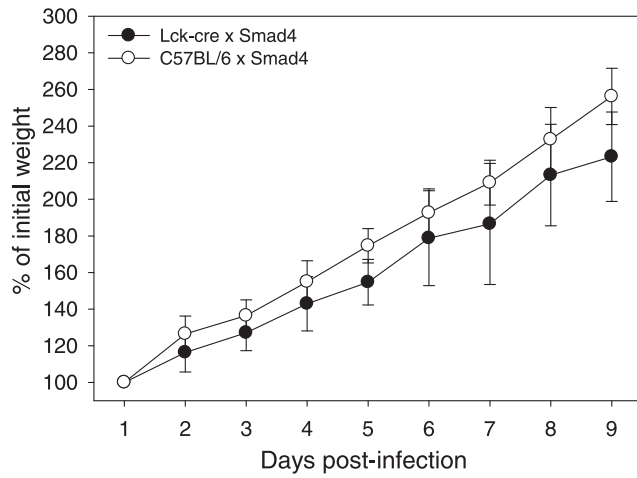

**SUPPLEMENTARY FIG. S2.** Mice were infected with an LD<sub>10</sub> dose of influenza virus A (PR8) and weighed daily. Data represent the mean  $\pm$  SD of 15–22 pups per group at the beginning of the experiment and ending up with 5–6 at day 9 postinfection. Mice were used for time points beginning at day 6 postinfection resulting in the reduced number. Data are representative of four separate experiments.
