# Supplementary material
Source: PubMed Central journal article supplement (PMC4677544)
Supplement: Supp_Fig3.pdf [file Supp_Fig3.pdf]

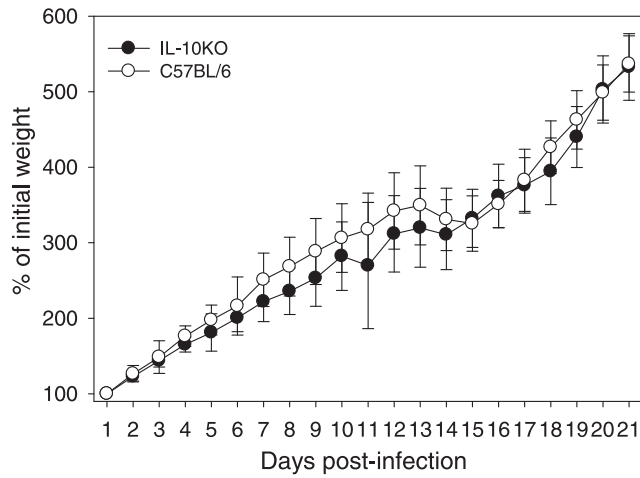

**SUPPLEMENTARY FIG. S3.** Mice were infected with an LD<sub>10</sub> dose of influenza virus A (PR8) and weighed daily. Data represent the mean  $\pm$  SD of 70–80 pups per group at the beginning of the experiment and ending up with 7–13 at day 21 postinfection. Data are compiled from three separate experiments. Mice were used for time points beginning at day 6 postinfection resulting in the reduced number.
