# Supplementary material
Source: PubMed Central journal article supplement (PMC4677544)
Supplement: Supp_Fig4.pdf [file Supp_Fig4.pdf]

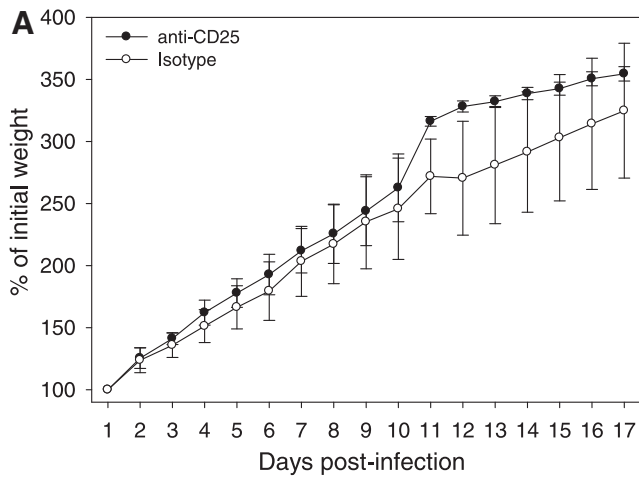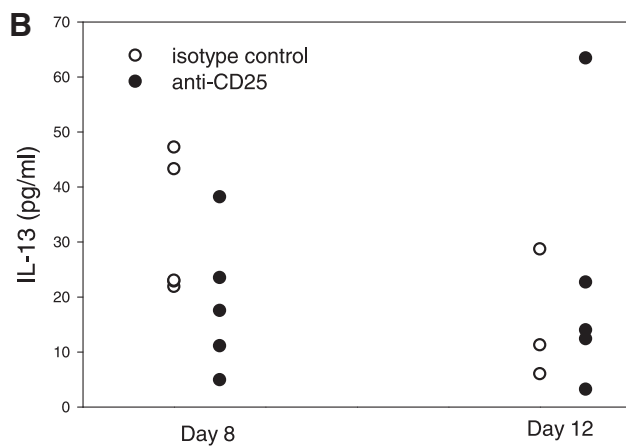

**SUPPLEMENTARY FIG. S4.** (A) Mice were infected with an LD<sub>10</sub> dose of influenza virus A (PR8) and weighed daily. Data represent the mean  $\pm$  SD of 30 pups per group at the beginning of the experiment and ending up with 5 at day 17 postinfection. Data compiled from two separate experiments. Mice were used for time points beginning at day 6 postinfection resulting in the reduced number. (B) IL-13 levels in the BALF were determined by ELISA. Data from individual mice in each group are shown. BALF, bronchial alveolar lavage fluid; IL, interleukin.
